# Supplementary material for: A highly flexible Ni–Co MOF nanosheet coated Au/PDMS film based wearable electrochemical sensor for continuous human sweat glucose monitoring
Source: Royal Society of Chemistry journal article supplement (doi:10.1039/d1an02214h), 2022-01-01
Supplement: d1an02214h1.pdf [file d1an02214h1.pdf]

## Supporting Information

# Highly Flexible Ni-Co MOF Nanosheets Coated Au/PDMS Film based Wearable Electrochemical Sensor for Continuous Human Sweat Glucose Monitoring

Yun Shu,<sup>a,\*</sup> Zhenjiao Shang,<sup>a</sup> Tong Su,<sup>a</sup> Shenghao Zhang,<sup>a</sup> Qin Lu,<sup>a</sup> Qin Xu,<sup>a</sup> Xiaoya Hu<sup>a,\*</sup>

<sup>a</sup>*School of Chemistry and Chemical Engineering, Yangzhou University, Yangzhou 225002, P.R.China*

\**Corresponding author. Email: shuyun@yzu.edu.cn, xyhu@yzu.edu.cn*

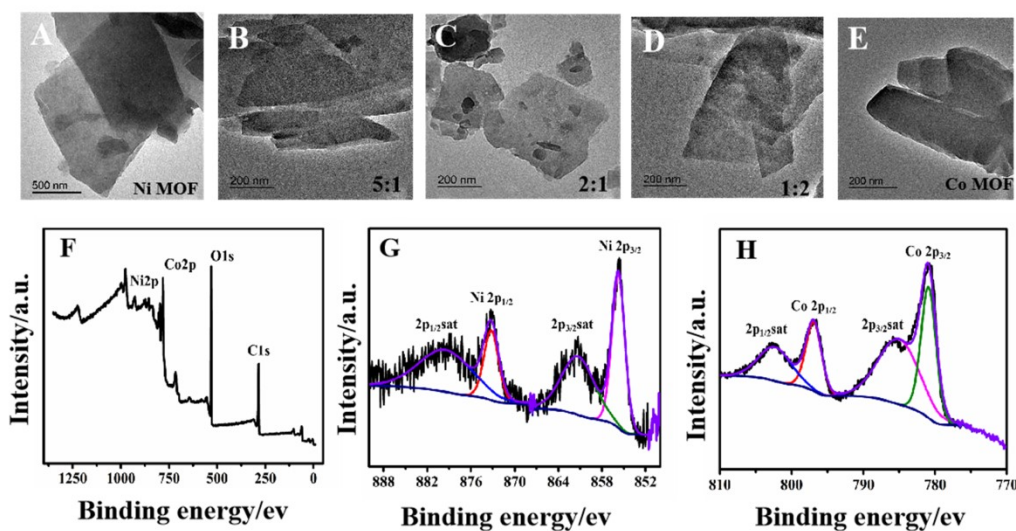

**Figure S1.** (A-E) TEM images of MOF products synthesized under different ratios of nickel and cobalt. (F) XPS spectra of the Ni-Co MOF nanocomposite. Corresponding spectra of Ni (G) and Co (H).

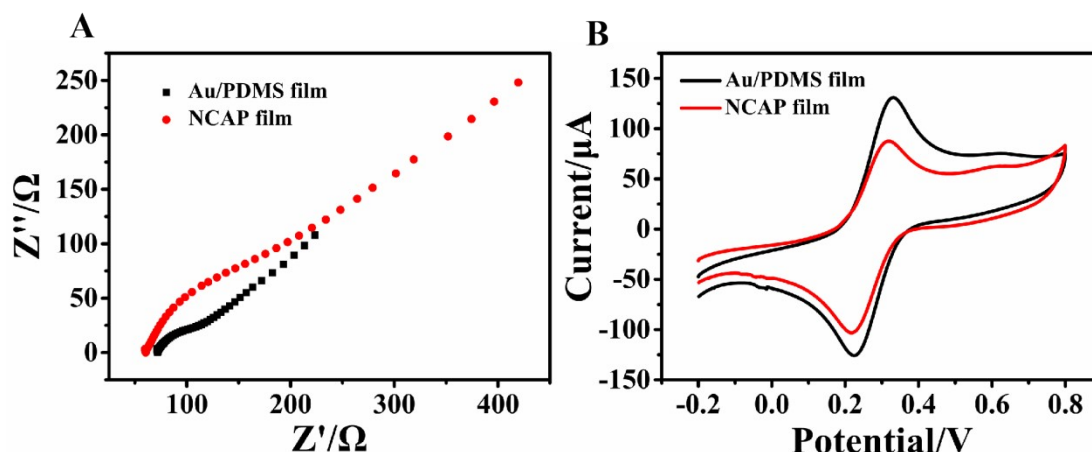

**Figure S2.** (A) The electrochemical impedance spectroscopy of Au/PDMS and NCAP film electrode conducted at open circuit voltage in the frequency range of 100 kHz to 0.01 Hz in potassium ferricyanide solution containing 1 M KCl and 2.5 mM  $\text{K}_3[\text{Fe}(\text{CN})_6]$  and  $\text{K}_4[\text{Fe}(\text{CN})_6]$ . (B) CV study of Au/PDMS and NCAP film electrode in potassium ferricyanide solution containing 1 M KCl and 2.5 mM  $\text{K}_3[\text{Fe}(\text{CN})_6]$  and  $\text{K}_4[\text{Fe}(\text{CN})_6]$ . Scan rate: 100 mV/s.

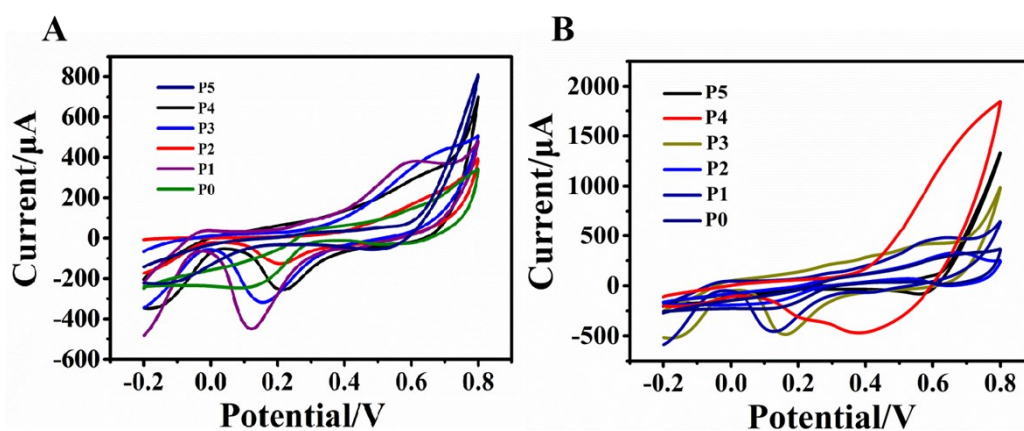

**Figure S3.** CV curves of flexible of Au/PDMS film electrode modified with MOF products synthesized under different ratios of nickel and cobalt in  $\text{N}_2$  saturated 0.1 M NaOH without glucose (A) and in presence of 0.5 mM glucose (B).

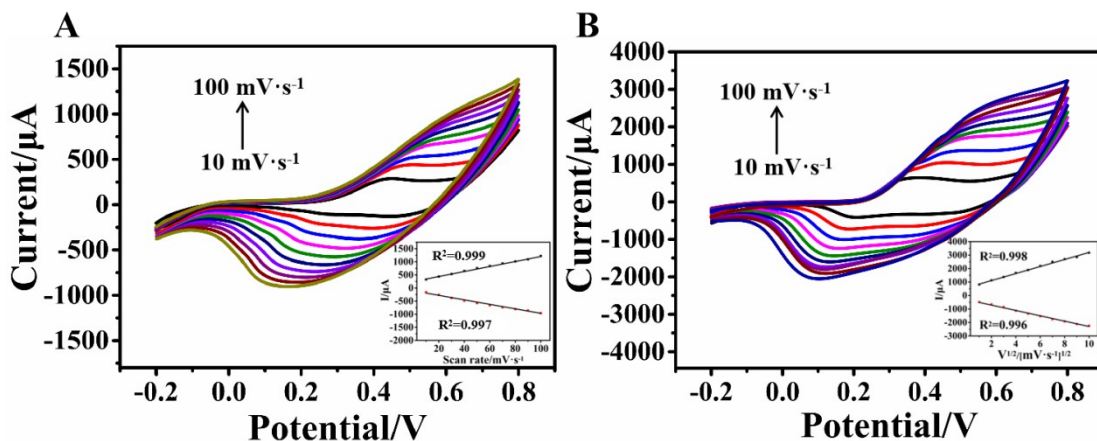

**Figure S4.** (A) CV curves of NCAP film electrode in 0.1 M NaOH at different scan rates (10–100  $\text{mV}\cdot\text{s}^{-1}$ ). Inset: the calibration curves of oxidation and reduction peak currents with the scan rate. (B) CV curves of NCAP film electrode in presence of 1 mM glucose at different scan rates (10–100  $\text{mV}\cdot\text{s}^{-1}$ ). Inset shows the corresponding calibration plots of oxidation and reduction peak currents with the square root of scan rates.

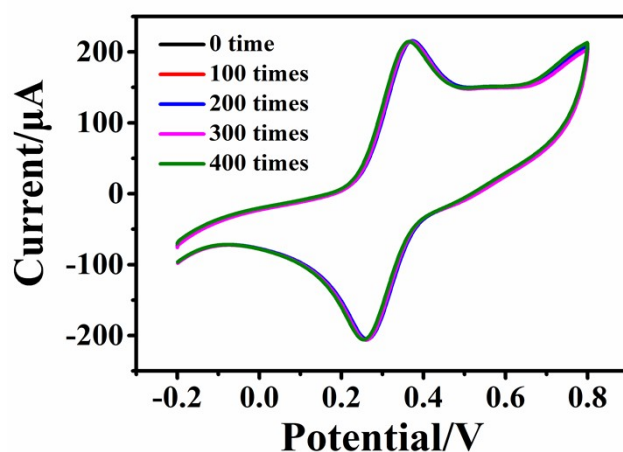

**Figure S5.** CV curves of the flexible sensor after cyclic stretching from 0 time to 400 times in potassium ferricyanide solution.

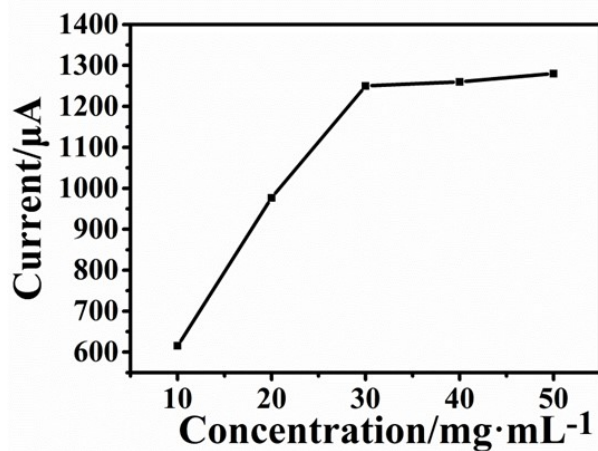

**Figure S6.** Influence of Ni-Co MOF with different concentrations on the response of NCAP film electrode in 0.1 M NaOH solution with 0.5 mM glucose.

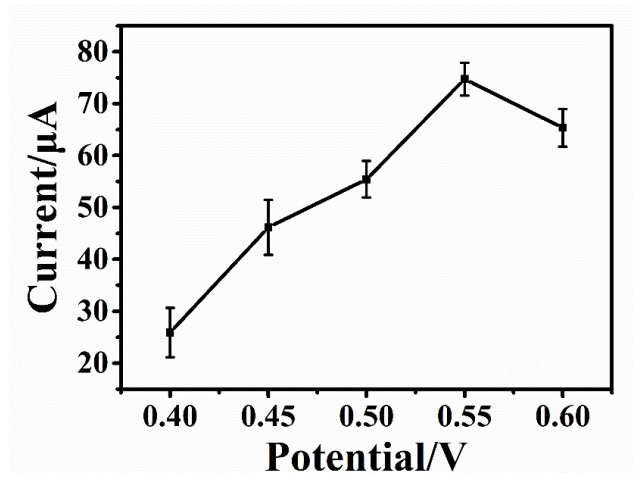

**Figure S7.** Amperometric study of NCAP film electrode in the presence of glucose at different potentials.

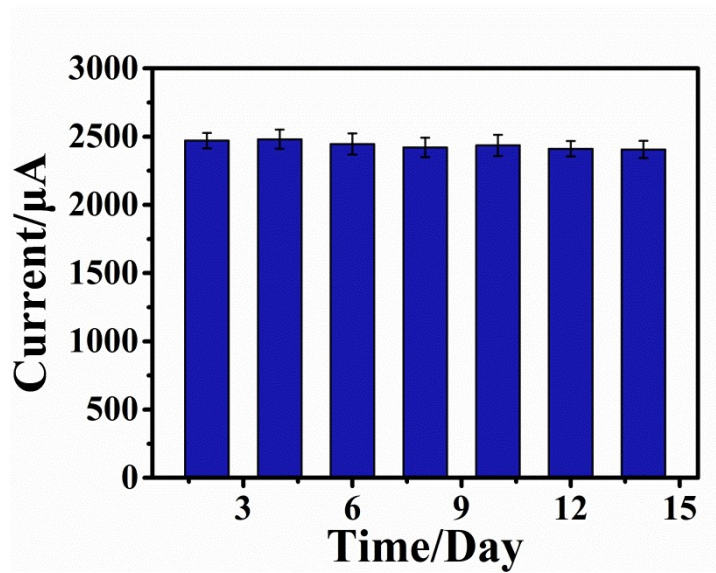

**Figure S8.** Variation of the current response to 1 mM glucose for NCAP film electrode versus storage time.

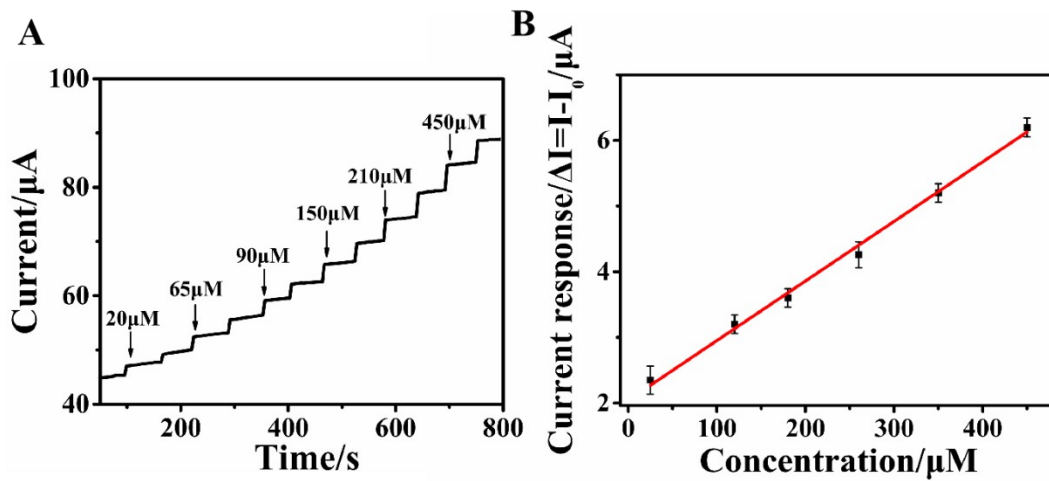

**Figure S9.** (A) Amperometric curve of NCAP film electrode to a serial of glucose concentration in PBS. (B) The corresponding calibration plots of current versus glucose concentration.

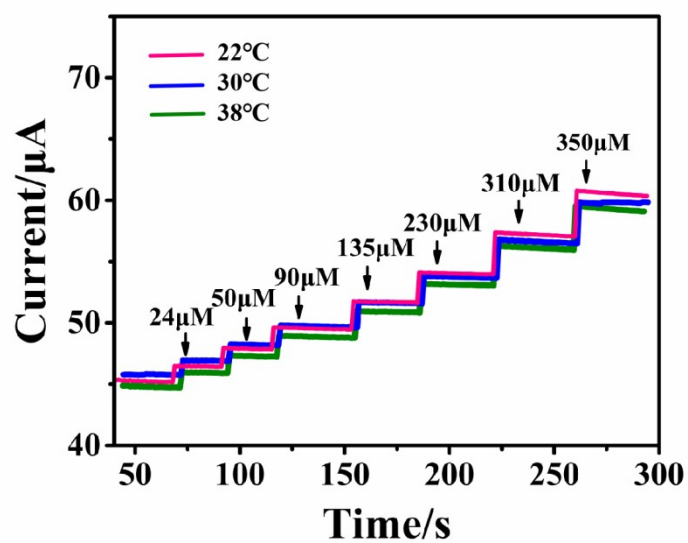

**Figure S10.** Amperometric curves of the NCAP film electrode at various glucose concentrations at temperatures of 22, 30, and 38 °C.

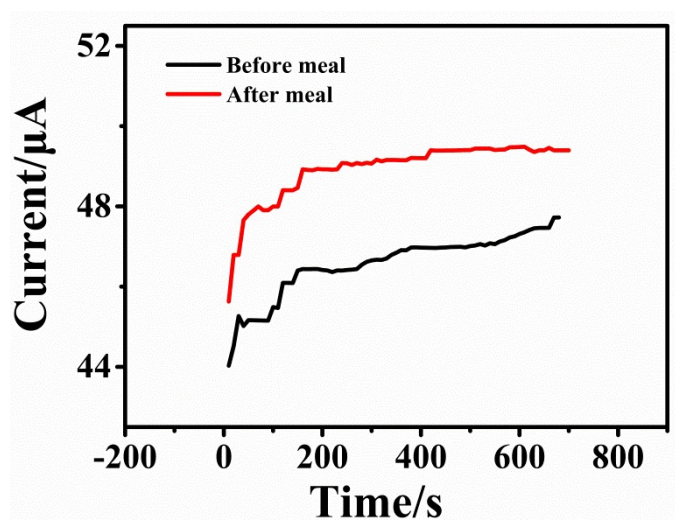

**Figure S11.** Comparison of sweat detection before and after meal.

**Table S1. Comparison of different nanocomposite based stretchable electrochemical sensors for detection of Glucose**

| Electrodes                                          | Sensitivity<br>( $\mu\text{A}\cdot\text{mM}^{-1}\cdot\text{cm}^{-2}$ ) | Limit of<br>Detection<br>( $\mu\text{M}$ ) | Linear<br>range<br>(mM) | Ref.         |
|-----------------------------------------------------|------------------------------------------------------------------------|--------------------------------------------|-------------------------|--------------|
| CoWO <sub>4</sub> /CNT on CNT/Au<br>nanosheet patch | 10.89                                                                  | 1.3                                        | 0.05-0.3                | 1            |
| Au/PB/GOx/Ch fiber                                  | 11.7                                                                   | 6                                          | 0-0.5                   | 2            |
| GOx/Ch/Nafion on Pt-graphite<br>patch               | 105                                                                    | 10                                         | 0-0.9                   | 3            |
| Cu on CNT fiber                                     | 46                                                                     | 50                                         | 0.05-5                  | 4            |
| rGO/PU-Au nanohybrid<br>wrinkled fiber              | 140                                                                    | ~                                          | 0.001-1.0               | 5            |
| Nanoporous gold (NPG) electrode                     | 57.56                                                                  | ~                                          | 0.1-1.0                 | 6            |
| Processed wrinkled gold electrodes                  | 750–810                                                                | ~                                          | 1-10                    | 7            |
| GOx/PB/graphene/<br>gold mesh                       | 1                                                                      | 10                                         | 0.01-0.7                | 8            |
| GOx/chitosan/PB/<br>CNT/gold                        | 2.35                                                                   | ~                                          | ~                       | 9            |
| GOx/chitosan/PB                                     | 23                                                                     | 3                                          | 0-0.1                   | 10           |
| NCAP film electrode                                 | 205.1                                                                  | 4.25                                       | 0.02-0.79               | This<br>work |

## References

1. S. Y. Oh, S. Y. Hong, Y. R. Jeong, J. Yun, H. Park, S. W. Jin, G. Lee, J. H. Oh, H. Lee, S.-S. Lee and J. S. Ha, *Acs Applied Materials & Interfaces*, 2018, **10**, 13729-13740.
2. Y. Zhao, Q. Zhai, D. Dong, T. An, S. Gong, Q. Shi and W. Cheng, *Analytical Chemistry*, 2019, **91**, 6569-6576.
3. A. Abellan-Llobregat, I. Jeerapan, A. Bandodkar, L. Vidal, A. Canals, J. Wang and E. Morallon, *Biosensors & Bioelectronics*, 2017, **91**, 885-891.
4. D. Jiang, Z. Liu, K. Wu, L. Mou, R. Ovalle-Robles, K. Inoue, Y. Zhang, N. Yuan, J. Ding, J. Qiu, Y. Huang and Z. Liu, *Polymers*, 2018, **10**.
5. T. Phan Tan, T. Tran Quang, D. Thi My Linh, C. W. Bae and N.-E. Lee, *Acs Applied Materials & Interfaces*, 2019, **11**, 10707-10717.
6. C. W. Bae, T. Phan Tan, B. Y. Kim, W. I. Lee, H. B. Lee, A. Hanif, E. H. Lee and N.-E. Lee, *Acs Applied Materials & Interfaces*, 2019, **11**, 14567-14575.
7. Y. Chan, M. Skreta, H. McPhee, S. Saha, R. Deus and L. Soleymani, *Analyst*, 2019, **144**, 1850-1850.
8. H. Lee, T. K. Choi, Y. B. Lee, H. R. Cho, R. Ghaffari, L. Wang, H. J. Choi, T. D. Chung, N. S.

- Lu, T. Hyeon, S. H. Choi and D. H. Kim, *Nature Nanotechnology*, 2016, **11**, 566-572.
9. W. Gao, S. Emaminejad, H. Y. Y. Nyein, S. Challa, K. Chen, A. Peck, H. M. Fahad, H. Ota, H. Shiraki, D. Kiriya, D.-H. Lien, G. A. Brooks, R. W. Davis and A. Javey, *Nature*, 2016, **529**, 509-514.
10. A. J. Bandothkar, W. Jia, C. Yardimci, X. Wang, J. Ramirez and J. Wang, *Analytical Chemistry*, 2015, **87**, 394-398.
